# Supplementary material for: Effective inhibition and eradication of pathogenic biofilms by titanium dioxide nanoparticles synthesized using Carum copticum extract
Source: Royal Society of Chemistry journal article supplement (doi:10.1039/d1ra02876f), 2021-01-01
Supplement: d1ra02876f1.pdf [file d1ra02876f1.pdf]

## Effective inhibition and eradication of pathogenic biofilms by titanium dioxide nanoparticles synthesized using *Carum copticum* extract

Mohammad Altaf<sup>ad</sup>, Mohammad Tarique Zeyad<sup>\*b</sup>, Md Amiruddin Hashmi<sup>c</sup>, Salim Manoharadas<sup>d</sup>, Shaik Althaf Hussain<sup>d</sup>, Mohammed Saeed Ali Abuhasil<sup>e</sup>, Mohammed Abdulaziz M. Almuzaini<sup>d</sup>

<sup>a</sup> Department of Chemistry, College of Science, King Saud University, Riyadh, 11451, Saudi Arabia.

<sup>b</sup> Department of Agricultural Microbiology, Faculty of Agricultural Sciences, Aligarh Muslim University, Aligarh, UP-202002, India.

<sup>c</sup> Interdisciplinary Biotechnology Unit, Aligarh Muslim University, Aligarh, UP-202002, India.

<sup>d</sup> Central Laboratory, College of Science, King Saud University, Riyadh 11451, Saudi Arabia.

<sup>e</sup> Department of Food Science and Nutrition, College of Food & Agriculture Sciences, King Saud University, Riyadh 11451, Saudi Arabia.

\* Corresponding author

**Dr. Mohammad Tarique Zeyad**

Department of Agricultural Microbiology

Faculty of Agricultural Sciences

Aligarh Muslim University

Aligarh, UP-202002, India.

E-mail: [mohd.zeyad@gmail.com](mailto:mohd.zeyad@gmail.com)

## Supplementary Figure

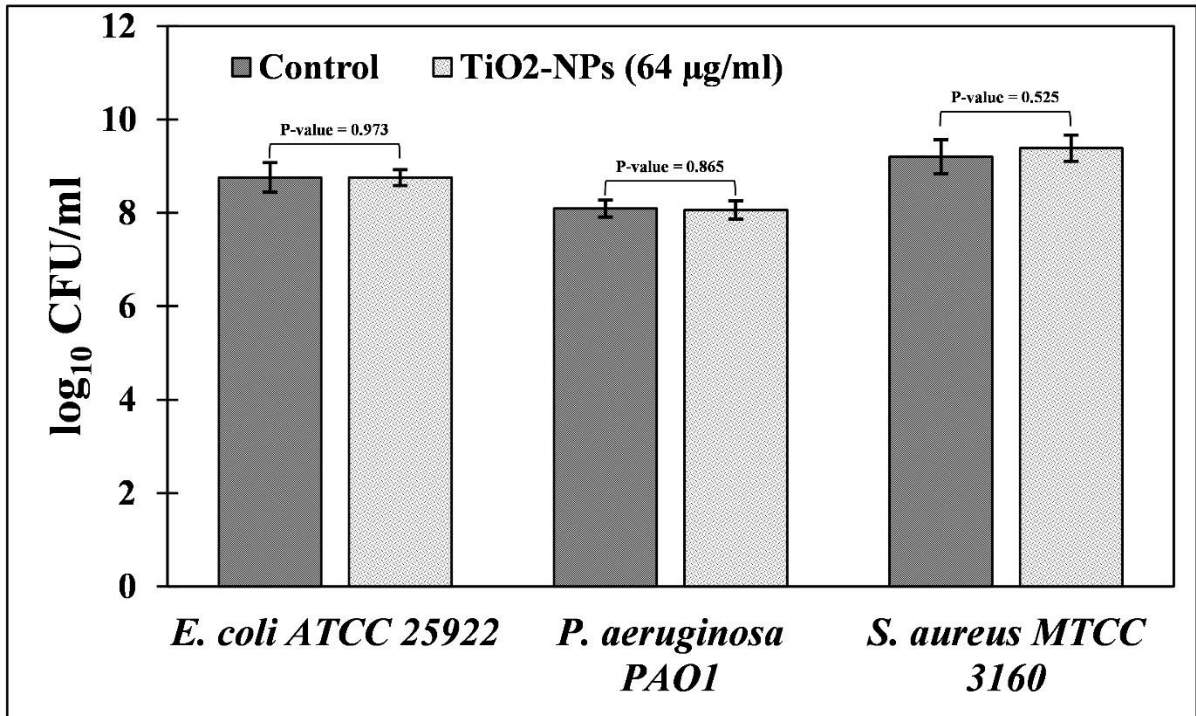

**Supplementary Fig S1.** Effect of highest tested concentration (64 µg/ml) of TiO<sub>2</sub>-NPs on the viability of bacteria.
